# Supplementary material
Source: ML conference proceedings conference paper supplement (https://openreview.net/forum?id=R3hGfRjx3B)
Supplement: supplementary_material [file DeepCSupple.pdf › Supplementary/AdaAQ-Code/ContinualExp/figure/DeepCSupple.pdf]

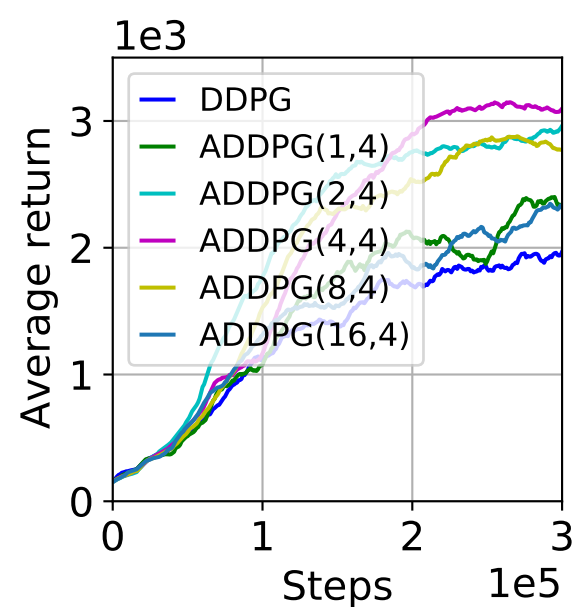

(a) ADDPG( $M, 4$ ) in Hopper

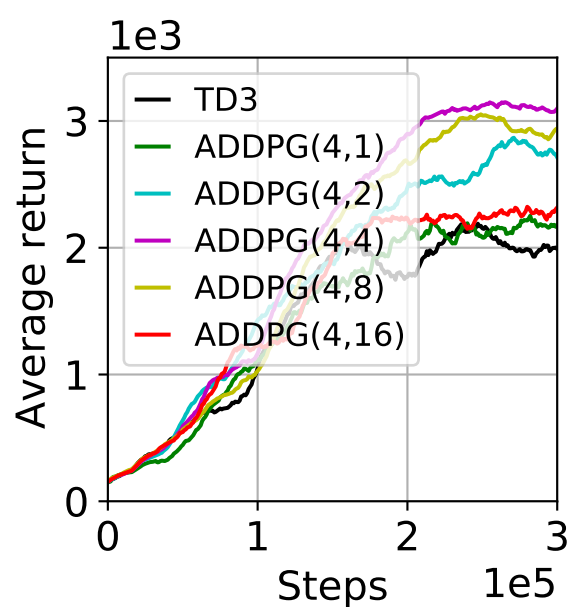

(b) ADDPG( $4, N$ ) in Hopper

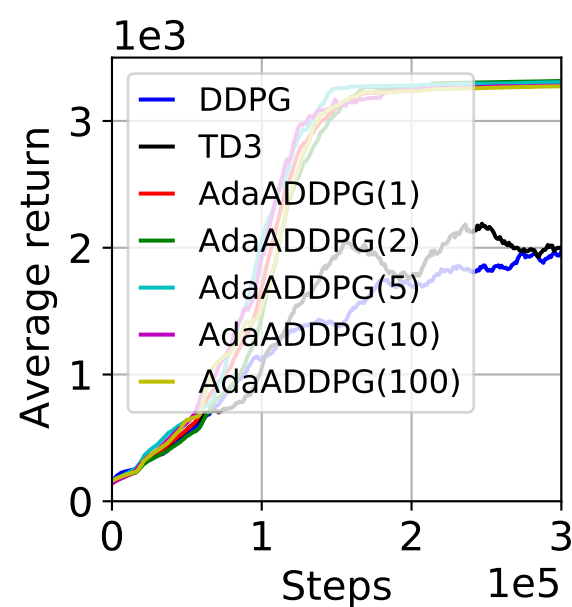

(c) AdaADDPG( $\tau$ ) in Hopper

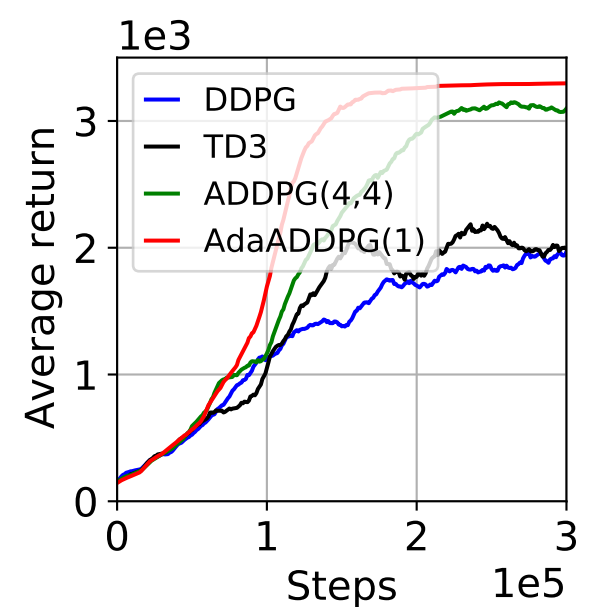

(d) AdaADDPG in Hopper

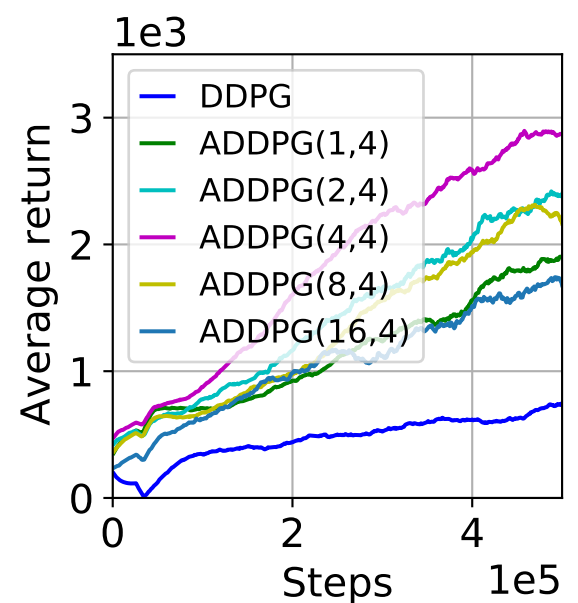

(e) ADDPG( $M, 4$ ) in Ant

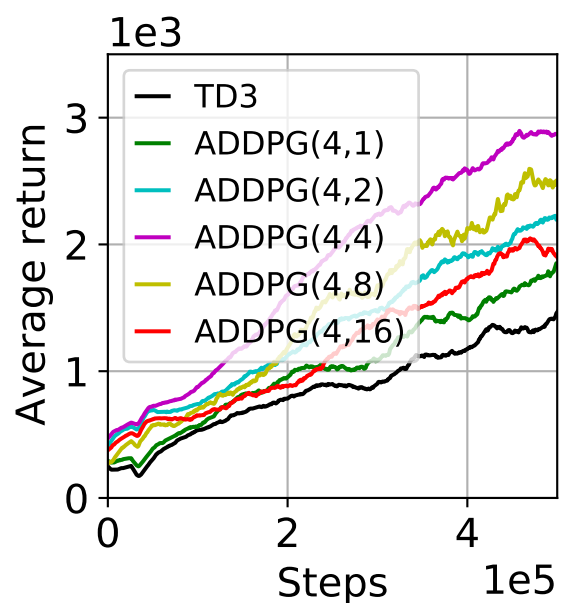

(f) ADDPG( $4, N$ ) in Ant

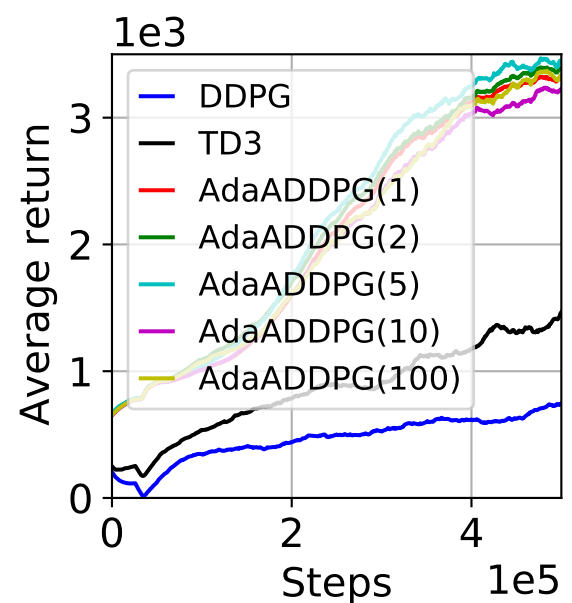

(g) AdaADDPG( $\tau$ ) in Ant

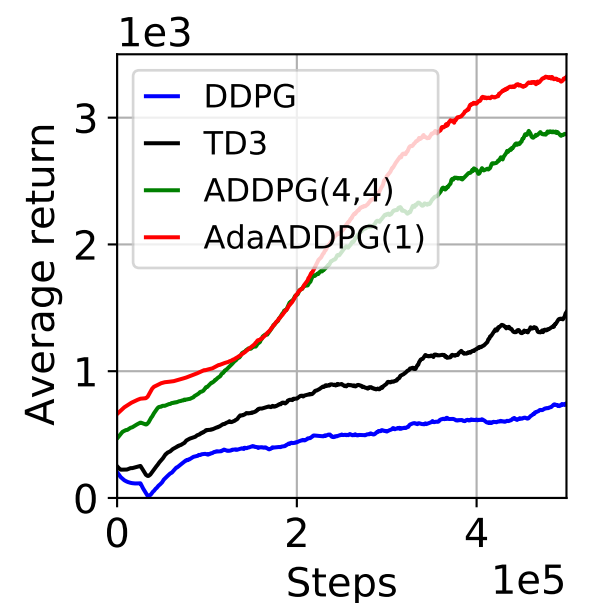

(h) AdaADDPG in Ant

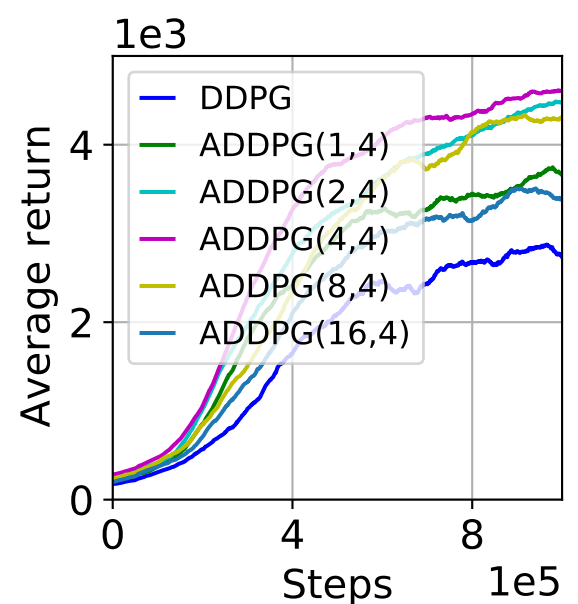

(i) ADDPG( $M, 4$ ) in Walker2d

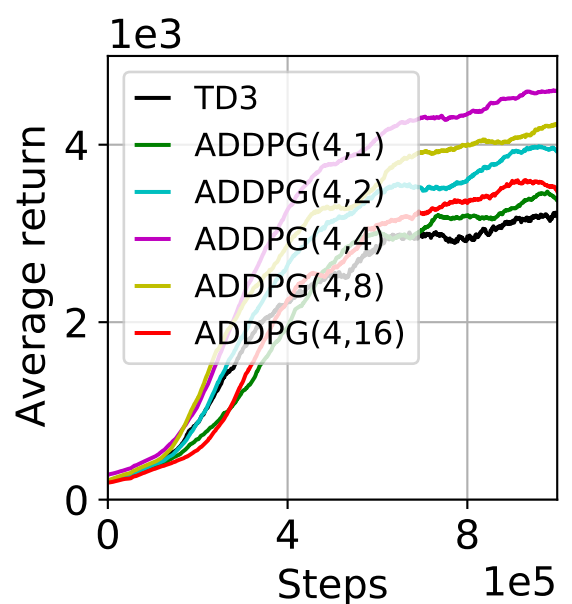

(j) ADDPG( $4, N$ ) in Walker2d

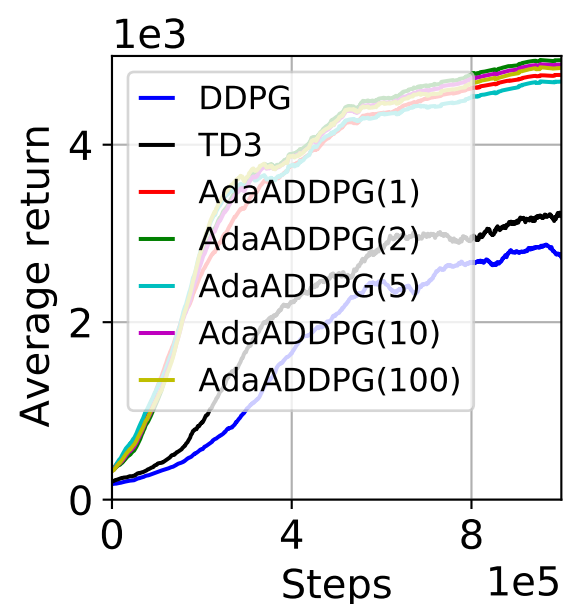

(k) AdaADDPG( $\tau$ ) in Walker2d

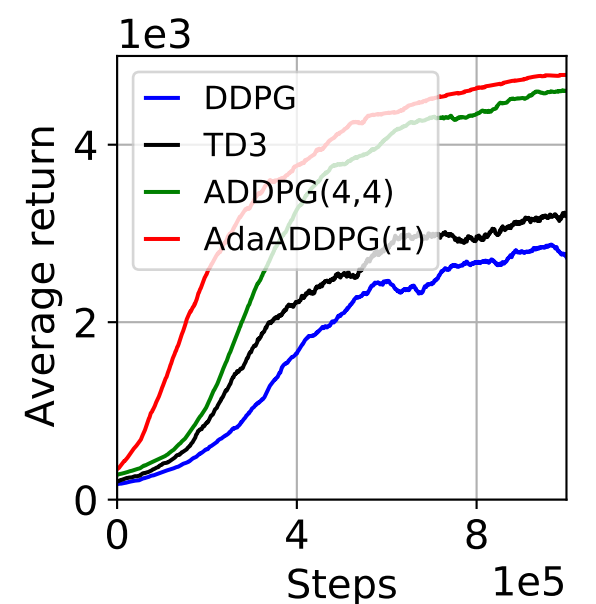

(l) AdaADDPG in Walker2d
