# Supplementary material
Source: ML conference proceedings conference paper supplement (https://openreview.net/forum?id=R3hGfRjx3B)
Supplement: supplementary_material [file SuppleDeepQ.pdf › Supplementary/AdaAQ-Code/DeepExp/figure/SuppleDeepQ.pdf]

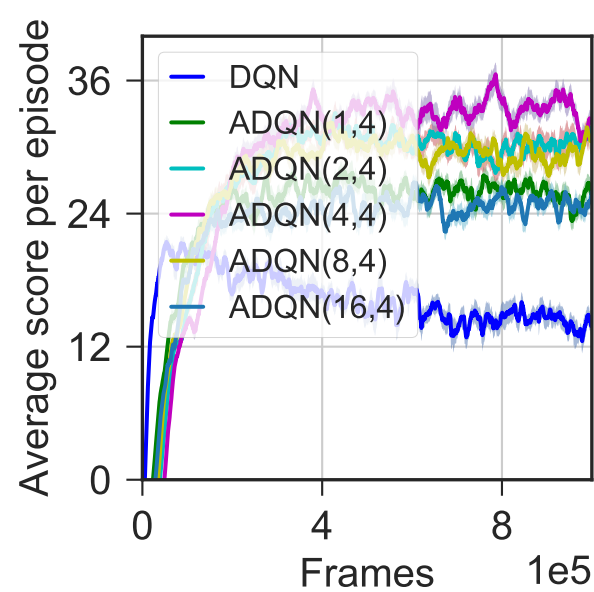

(a) ADQN( $M, 4$ ) in Pixelcopter

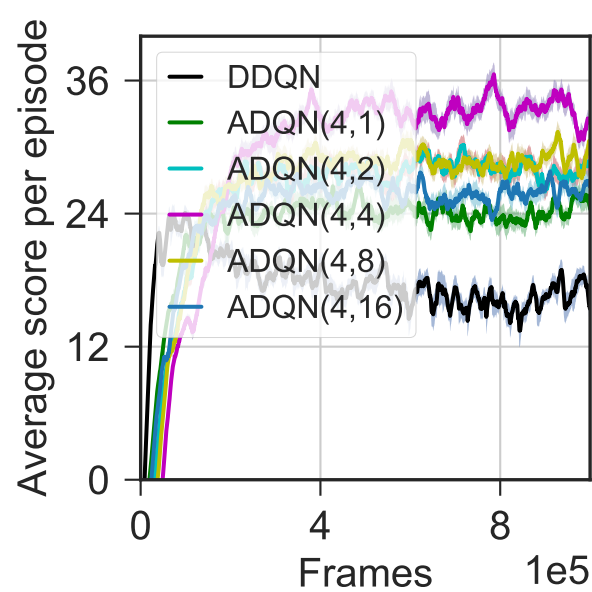

(b) ADQN( $4, N$ ) in Pixelcopter

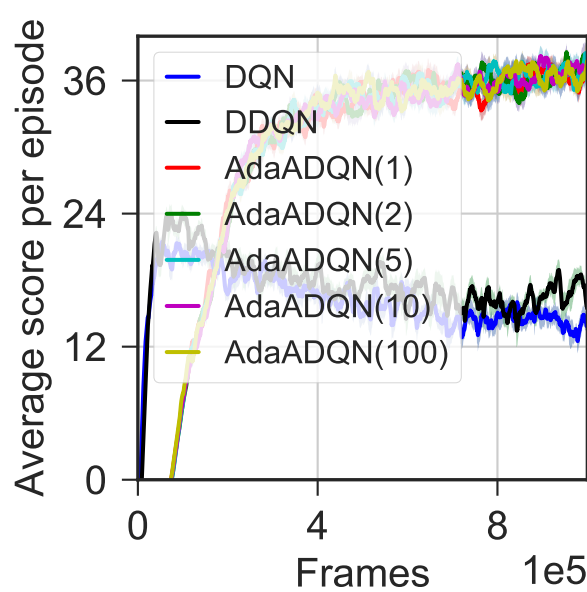

(c) AdaADQN( $\tau$ ) in Pixelcopter

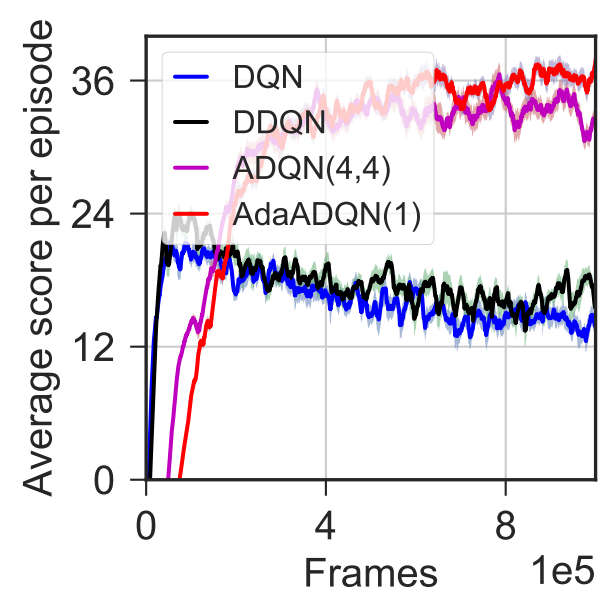

(d) AdaADQN in Pixelcopter

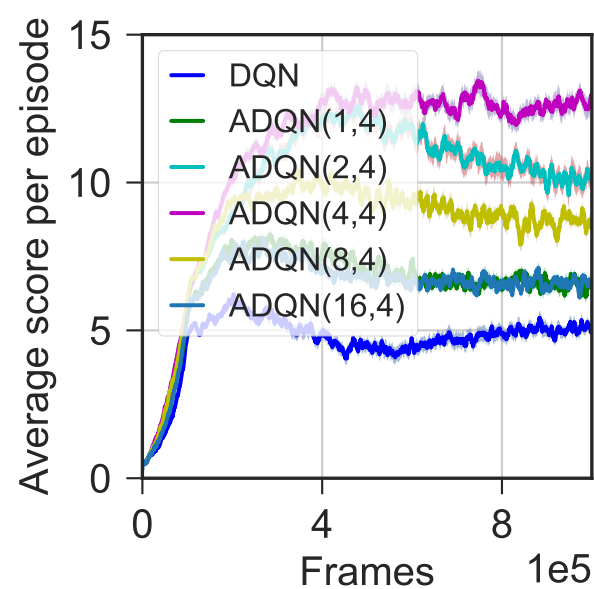

(e) ADQN( $M, 4$ ) in Breakout

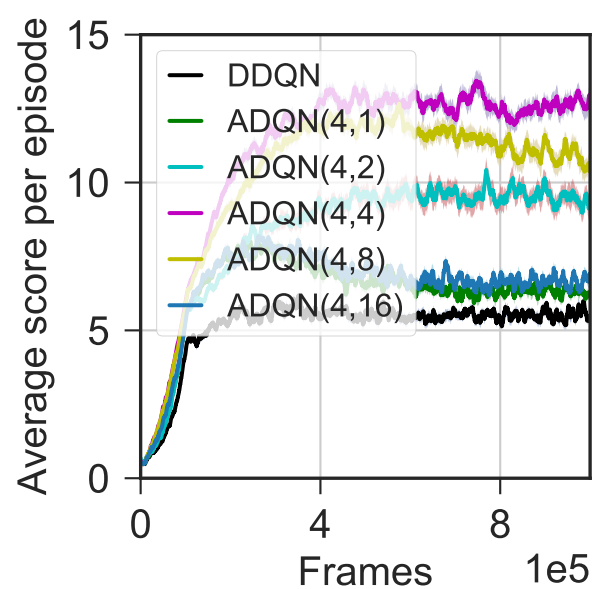

(f) ADQN( $4, N$ ) in Breakout

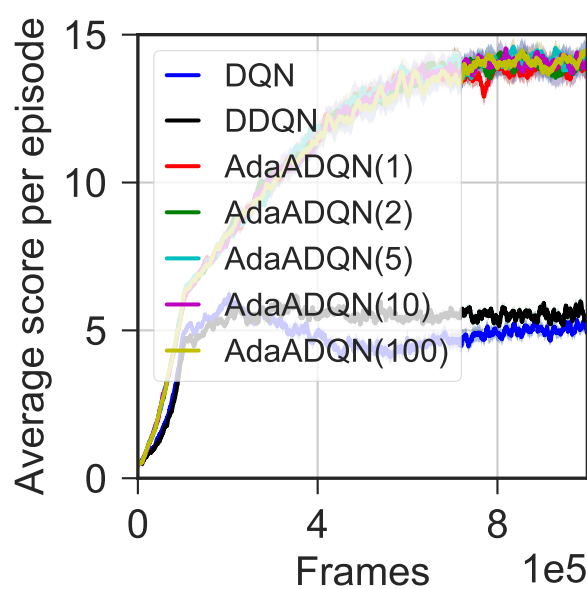

(g) AdaADQN( $\tau$ ) in Breakout

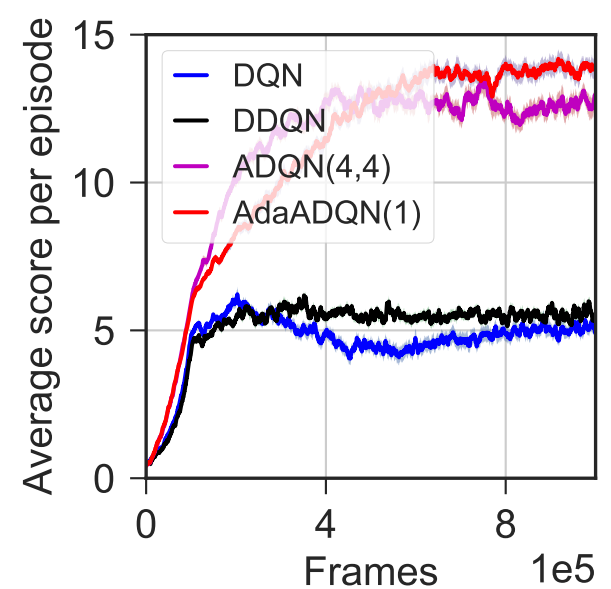

(h) AdaADQN in Breakout

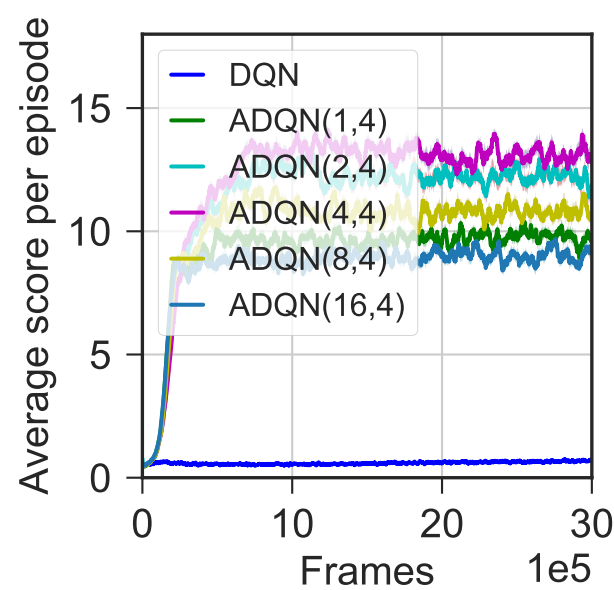

(i) ADQN( $M, 4$ ) in Asterix

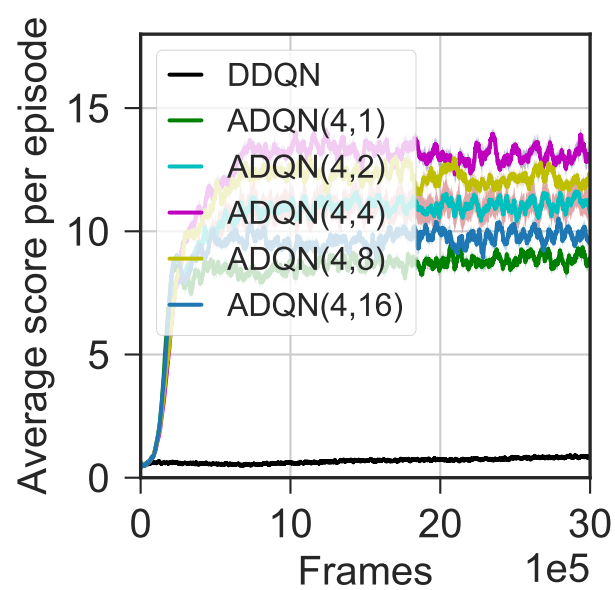

(j) ADQN( $4, N$ ) in Asterix

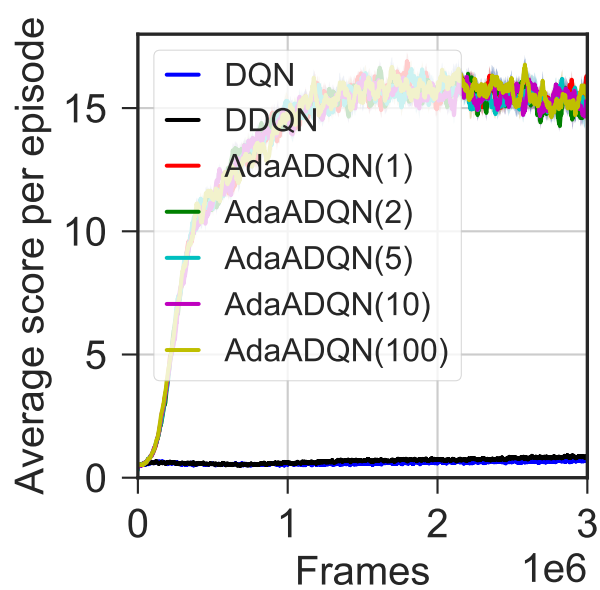

(k) AdaADQN( $\tau$ ) in Asterix

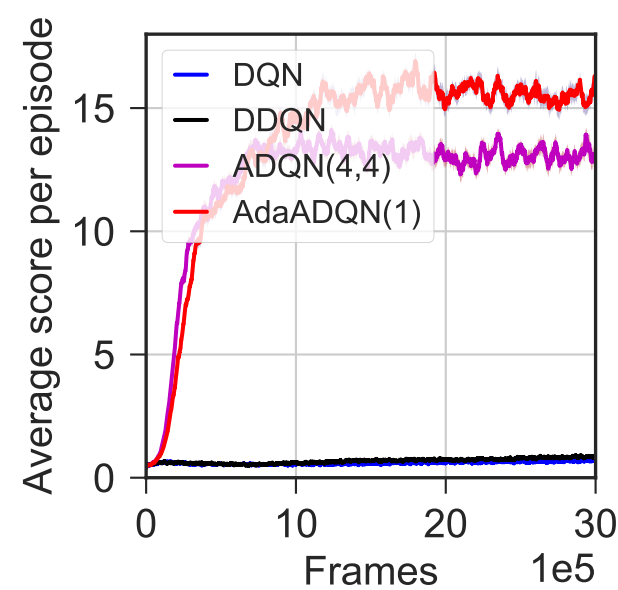

(l) AdaADQN in Asterix
