# Supplementary material
Source: ML conference proceedings conference paper supplement (https://openreview.net/forum?id=R3hGfRjx3B)
Supplement: supplementary_material [file SuppleTableQ.pdf › Supplementary/AdaAQ-Code/TableExp/Figure/SuppleTableQ.pdf]

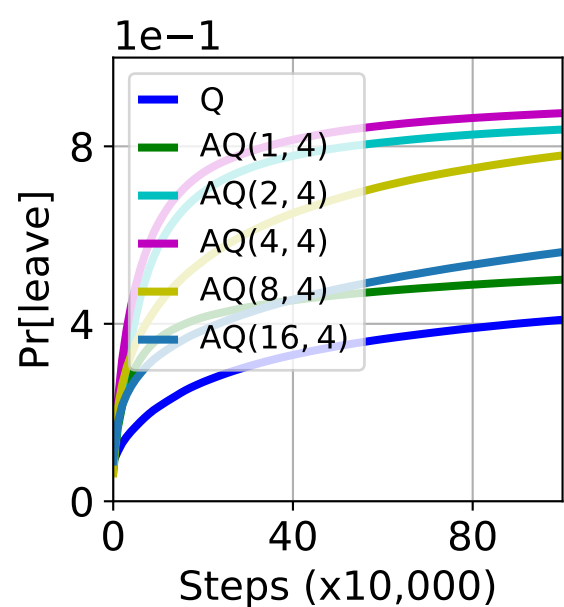

(a)  $AQ(M, 4)$  in Roulette

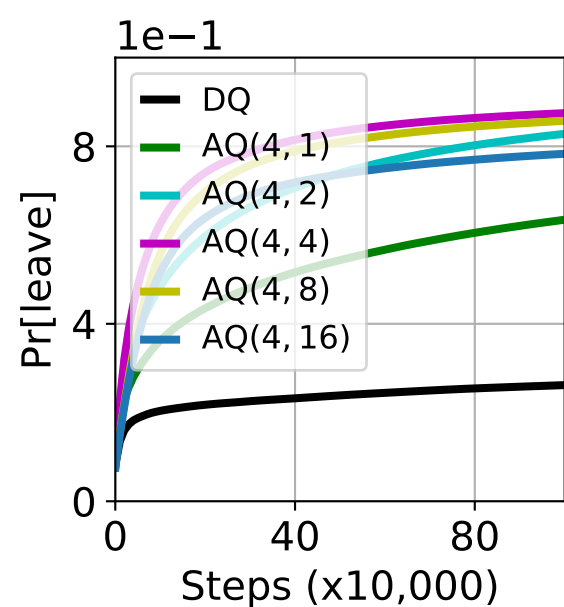

(b)  $AQ(4, N)$  in Roulette

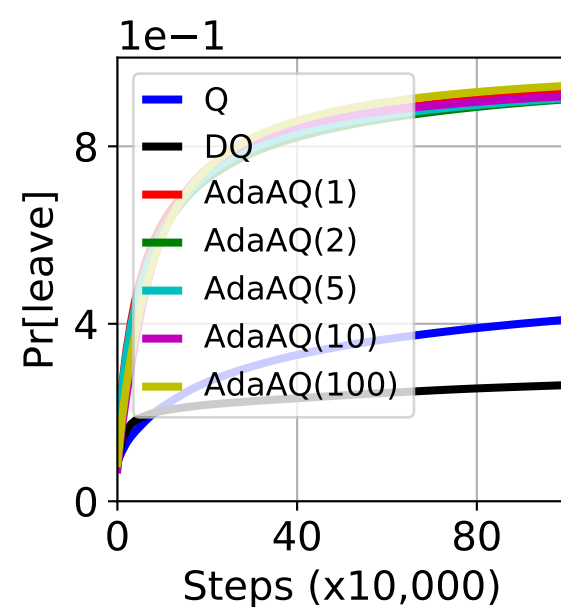

(c)  $AdaAQ(\tau)$  in Roulette

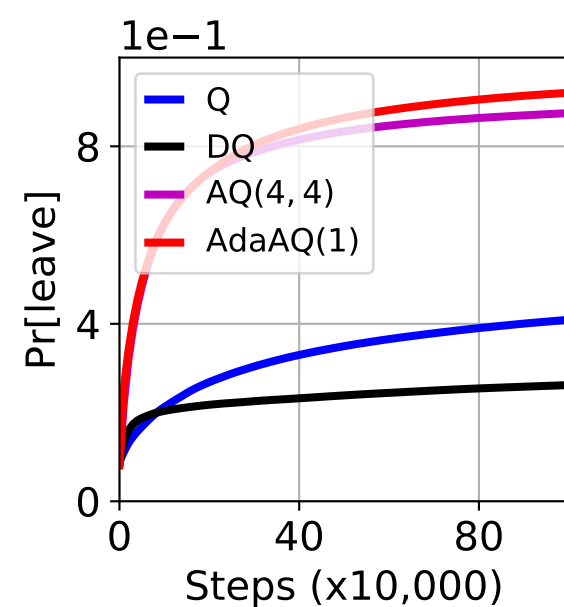

(d)  $AdaAQ$  in Roulette

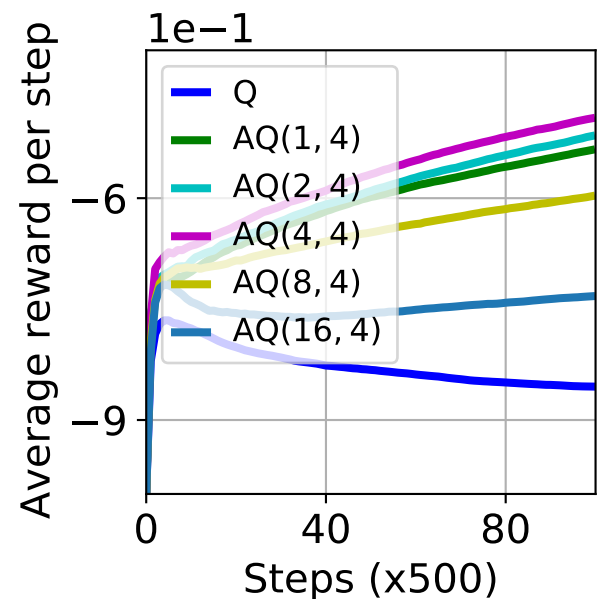

(e)  $AQ(M, 4)$  in Grid 3x3

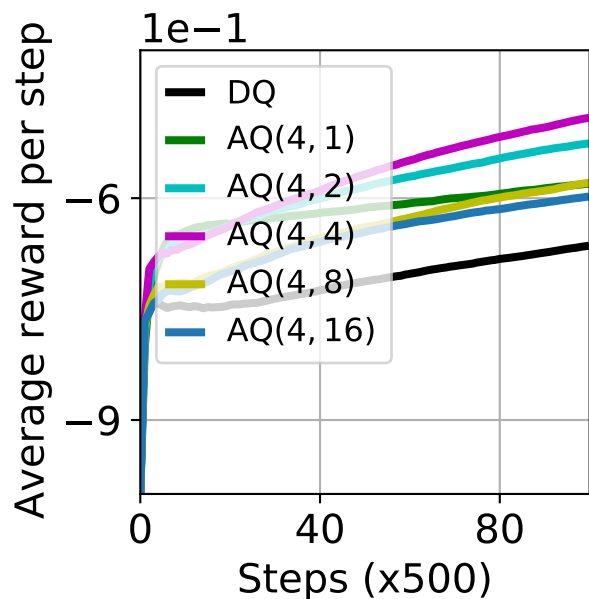

(f)  $AQ(4, N)$  in Grid 3x3

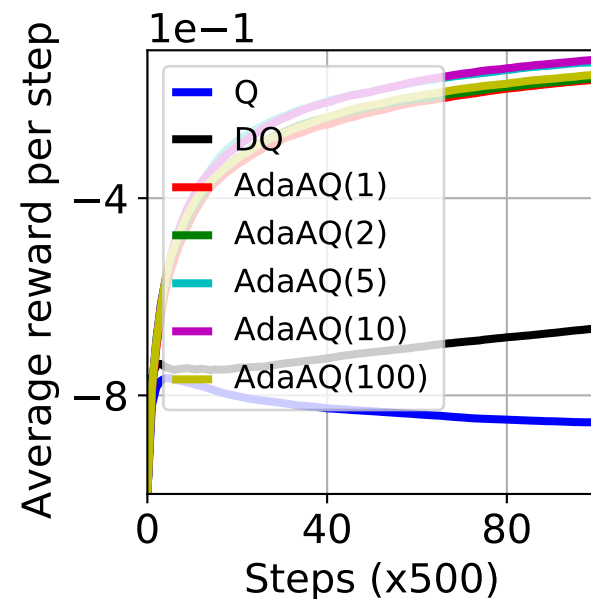

(g)  $AdaAQ(\tau)$  in Grid 3x3

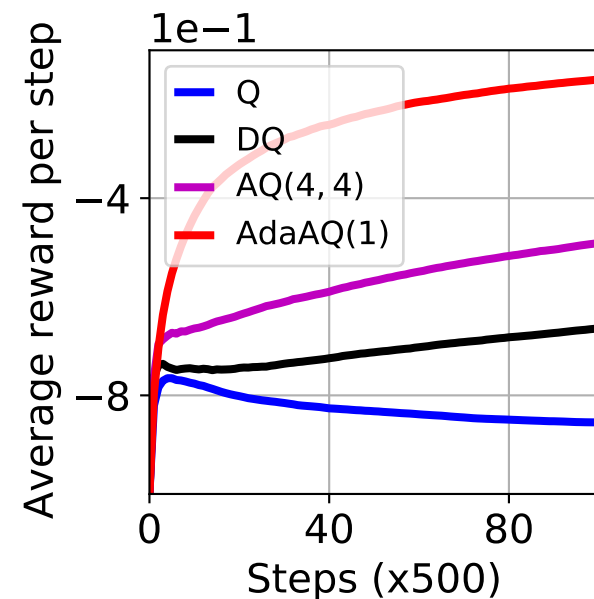

(h)  $AdaAQ$  in Grid 3x3

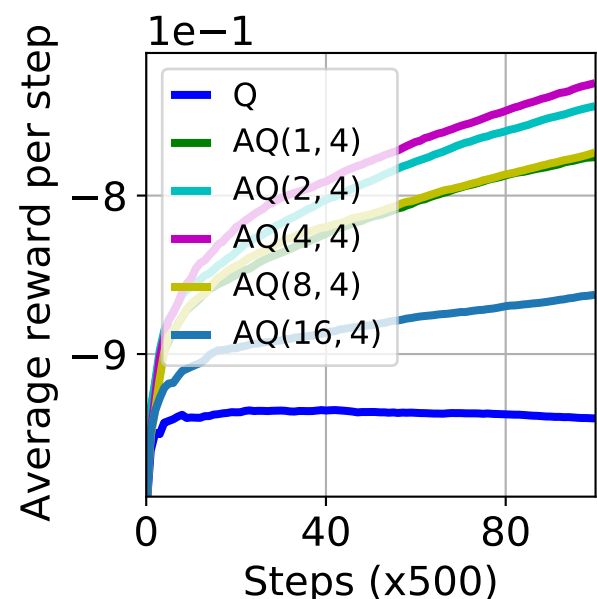

(i)  $AQ(M, 4)$  in Grid 4x4

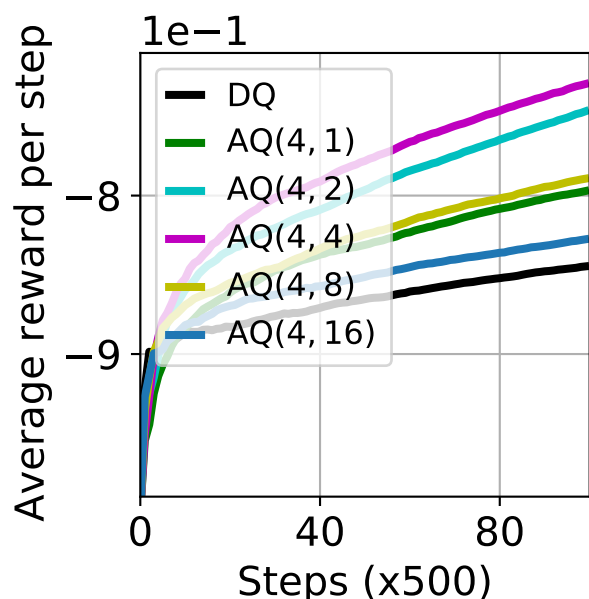

(j)  $AQ(4, N)$  in Grid 4x4

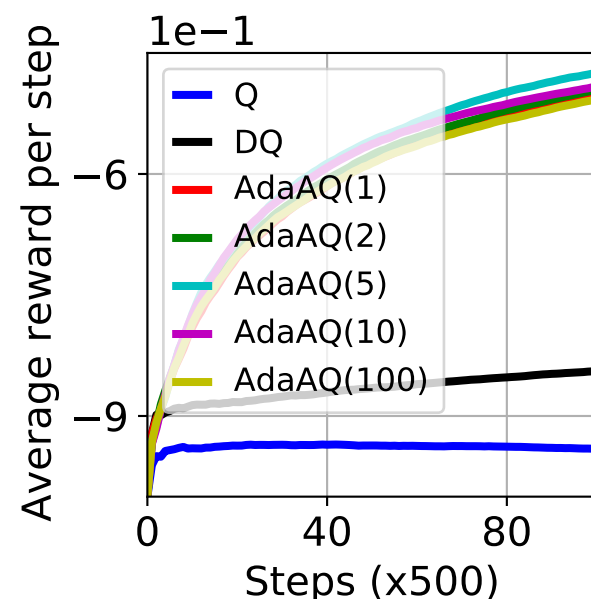

(k)  $AdaAQ(\tau)$  in Grid 4x4

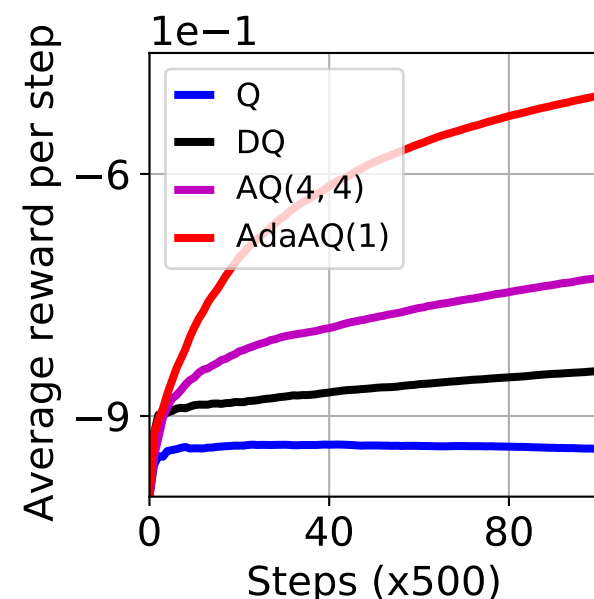

(l)  $AdaAQ$  in Grid 4x4
