# Supplementary material
Source: ML conference proceedings conference paper supplement (https://openreview.net/forum?id=R3hGfRjx3B)
Supplement: supplementary_material [file TableQ.pdf › Supplementary/AdaAQ-Code/TableExp/Figure/TableQ.pdf]

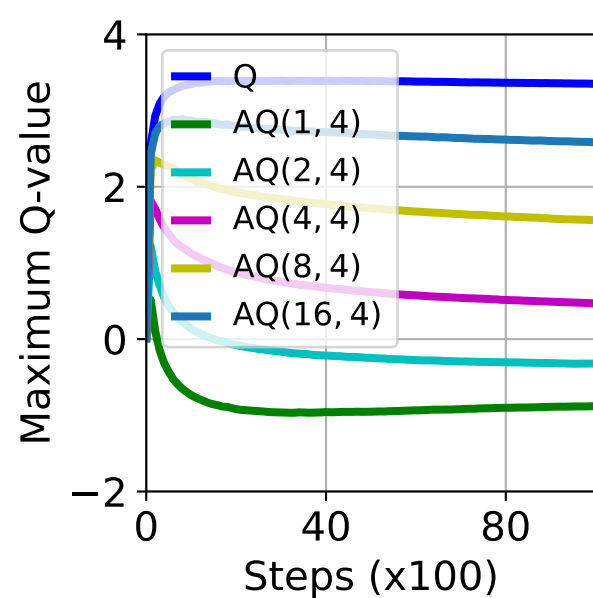

(a) AQ with diff  $M$

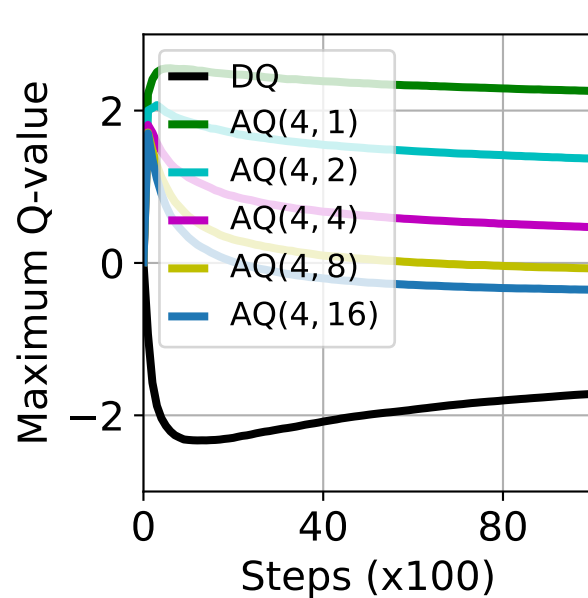

(b) AQ with diff  $N$

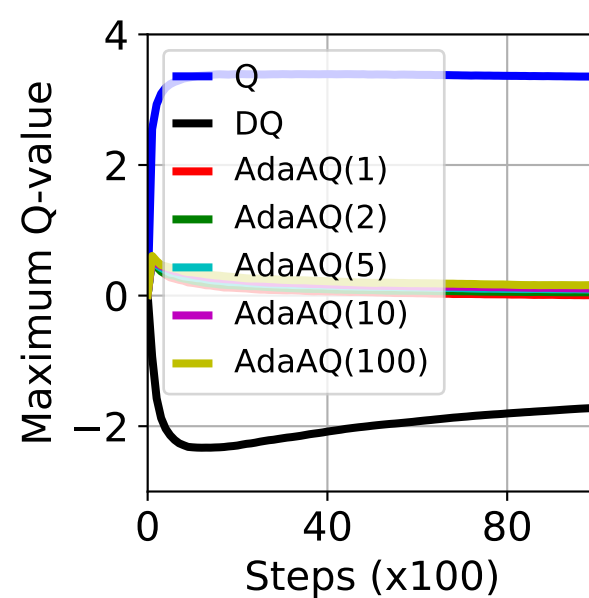

(c) AdaAQ with diff  $\tau$

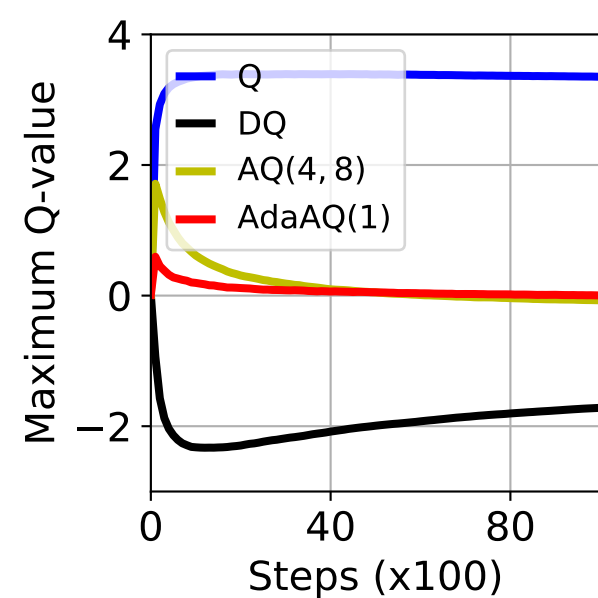

(d) AdaAQ VS AQ

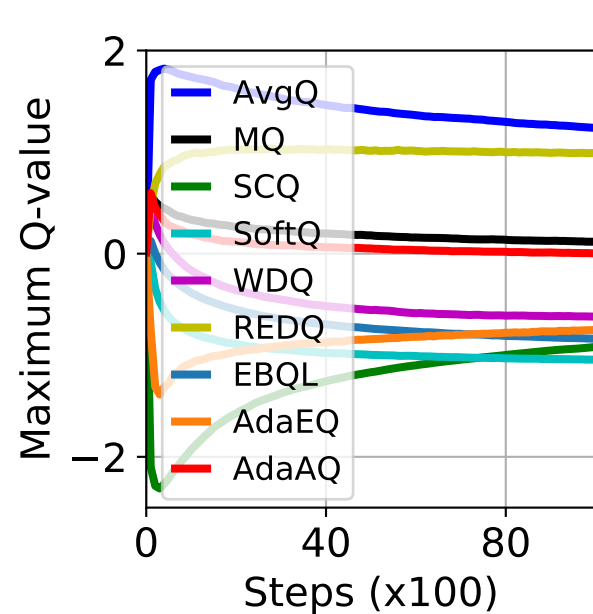

(e) SOTA in Multi-armed

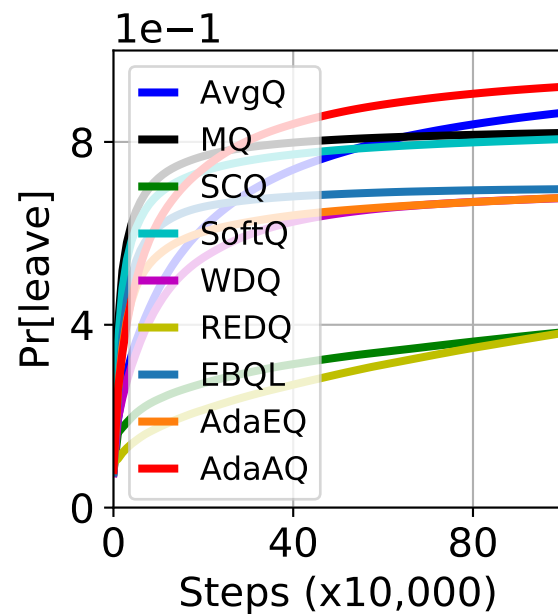

(f) SOTA in Roulette

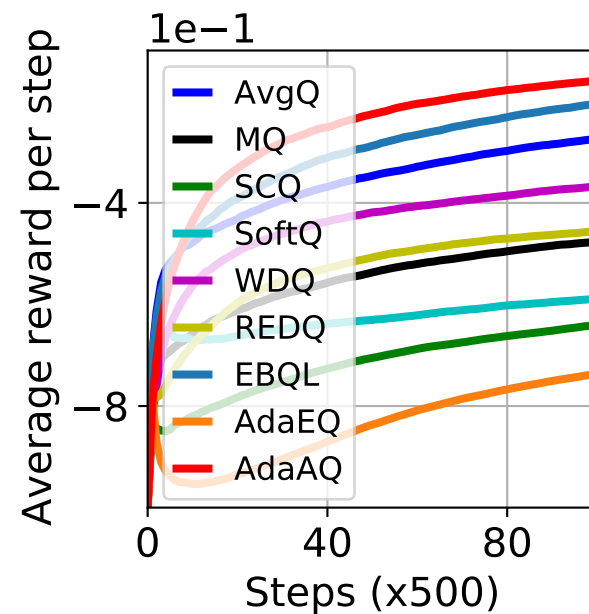

(g) SOTA in Gridworld 3x3

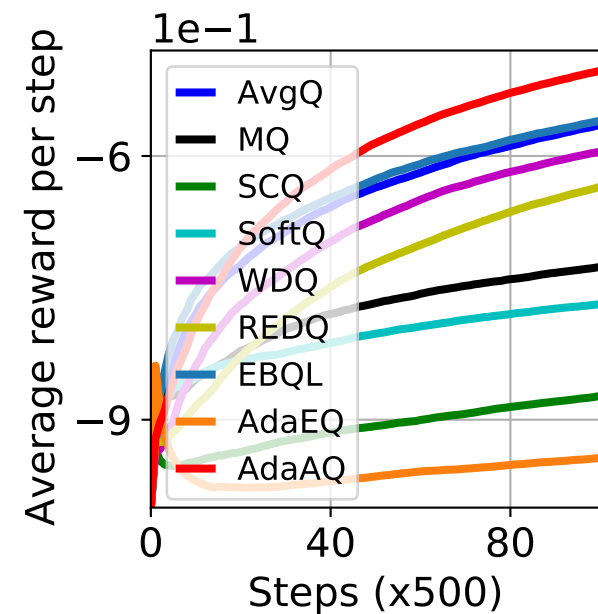

(h) SOTA in Gridworld 4x4
