# Supplementary material
Source: ML conference proceedings conference paper supplement (https://openreview.net/forum?id=R3hGfRjx3B)

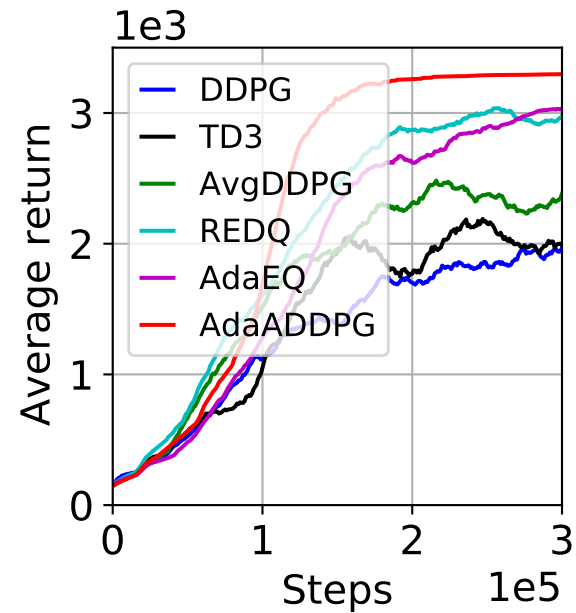

(a) SOTA in Hopper

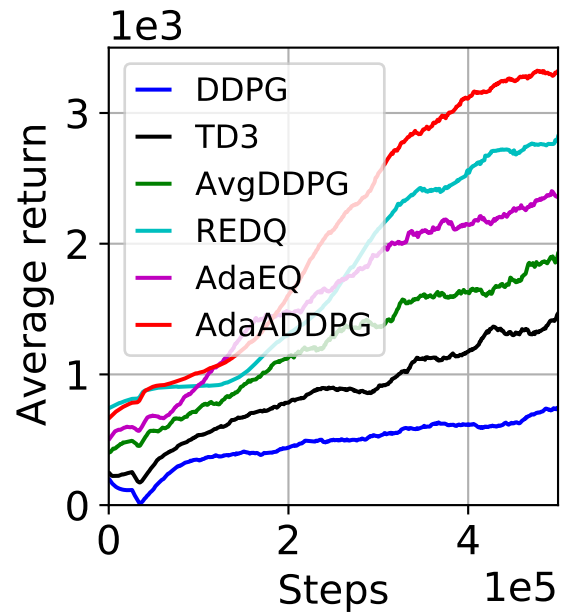

(b) SOTA in Ant

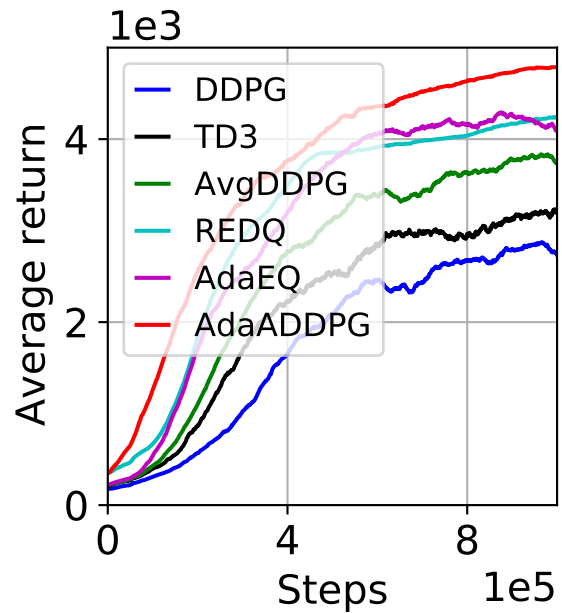

(c) SOTA in Walker2d

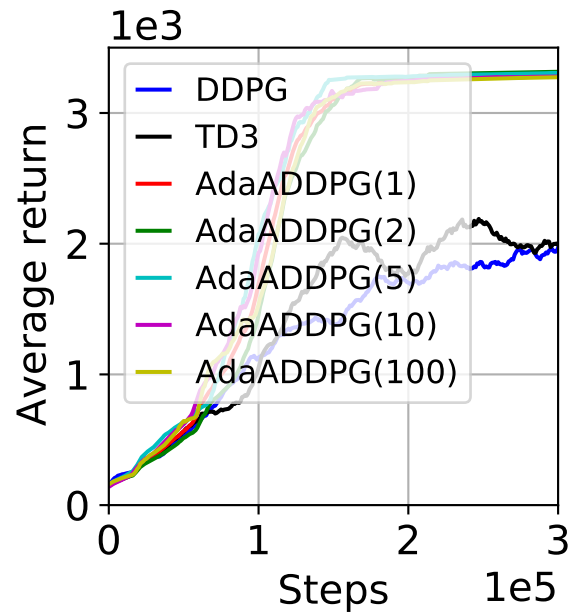

(d) AdaADDPG( $\tau$ ) in Hopper

Supplement: supplementary_material [file DeepC.pdf › Supplementary/AdaAQ-Code/ContinualExp/figure/DeepC.pdf]

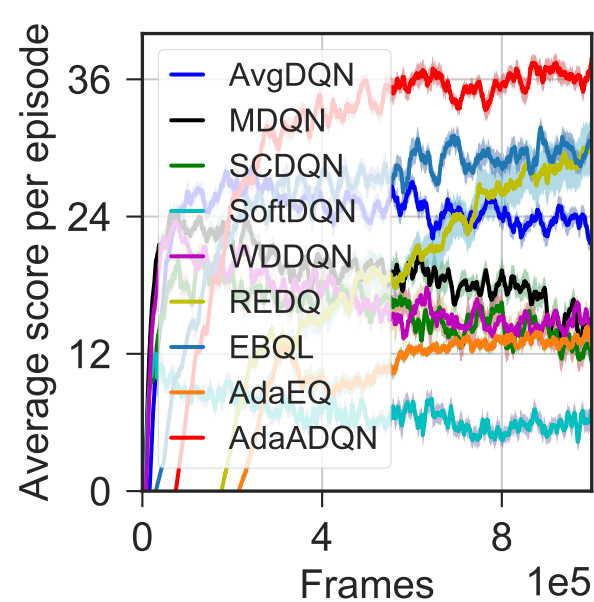

(a) SOTA in Pixelcopter

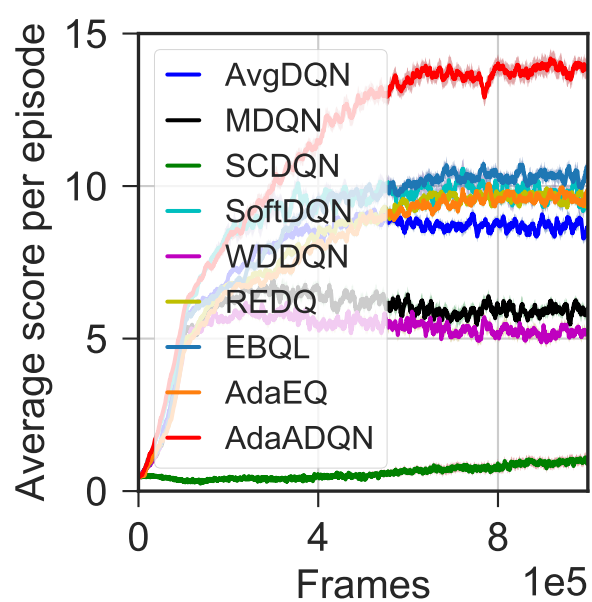

(b) SOTA in Breakout

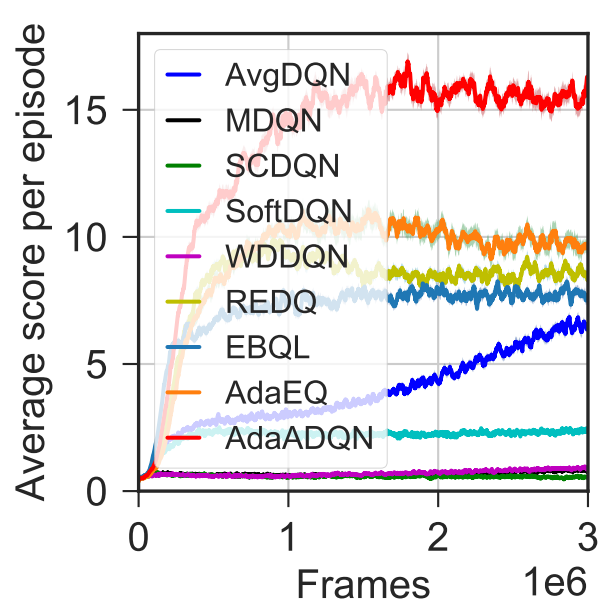

(c) SOTA in Asterix

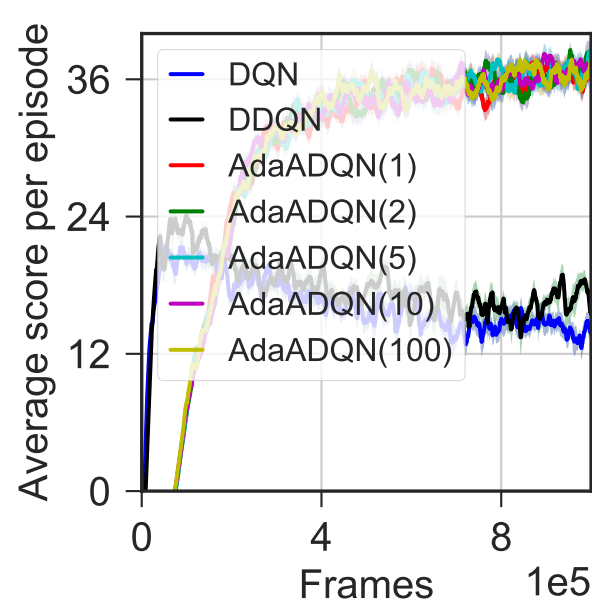

(d) AdaADQN( $\tau$ ) in Pixelcopter

Supplement: supplementary_material [file DeepQ.pdf › Supplementary/AdaAQ-Code/DeepExp/figure/DeepQ.pdf]

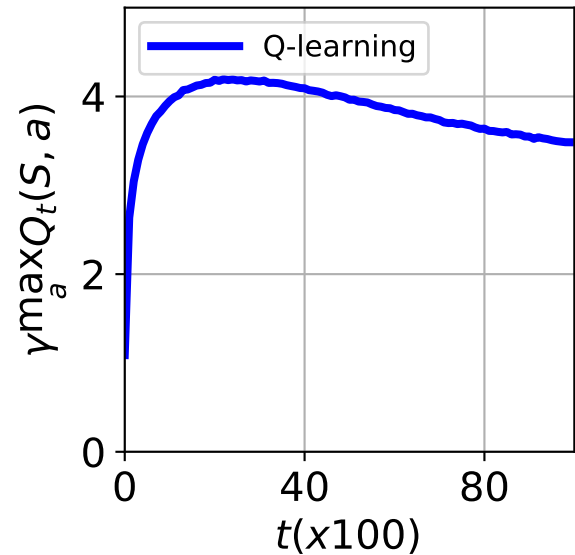

(a) Overestimation bias

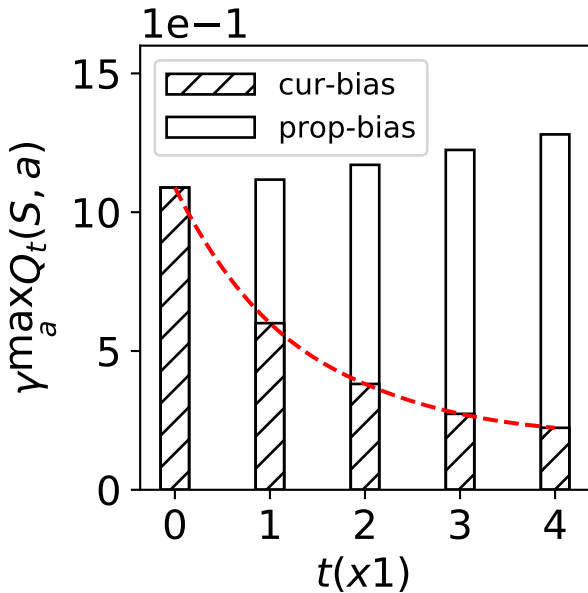

(b) Cur- & Prop-bias

Supplement: supplementary_material [file Example.pdf › Supplementary/AdaAQ-Code/Example/Figure/Example.pdf]
